# Supplementary material for: Prevalence, aetiologies and prognosis of the symptom cough in primary care: a systematic review and meta-analysis
Source: Springer Nature journal article supplement (doi:10.1186/s12875-021-01501-0), 2021-07-12
Supplement: MOESM2 [file 19353898]

## Additional file 2: Assessment of methodical quality, risk of bias and sources of clinical heterogeneity

### Instrument:

For each domain, reviewers independently answered the standardized key questions (yes, no or unclear) and assessed the risk of bias for the respective domain (low, high or unclear). In Domain A reviewers also rated their concern that the selection of patients and/or of GPs may have introduced substantial variation/ clinical heterogeneity (low, high or unclear).

Domain A and B referred to all studies regardless of the respective study outcome. Domain C was only considered if the respective study reported data on the underlying aetiologies of cough patients. Domain D was only considered if the respective study presented prognostic outcomes. In Domain C and D, key questions had to be answered separately for each diagnostic or prognostic category respectively.

|                                                                                                                                                                                                                                                                              |                                                                                                                                                                                                         |
|------------------------------------------------------------------------------------------------------------------------------------------------------------------------------------------------------------------------------------------------------------------------------|---------------------------------------------------------------------------------------------------------------------------------------------------------------------------------------------------------|
| <b>Domain A: Selection of patients and GPs (refers to all studies regardless of the review question)</b>                                                                                                                                                                     |                                                                                                                                                                                                         |
| Item 1                                                                                                                                                                                                                                                                       | Was the symptom to be investigated clearly described?                                                                                                                                                   |
| Item 2                                                                                                                                                                                                                                                                       | Were the selection criteria of the patients clearly described?                                                                                                                                          |
| Item 3                                                                                                                                                                                                                                                                       | Was a consecutive or random sample of patients enrolled?                                                                                                                                                |
| Item 4                                                                                                                                                                                                                                                                       | Was it a multi-centre study?                                                                                                                                                                            |
| <i>Judgement: Risk that the selection of patients introduced bias: low, unclear, high</i>                                                                                                                                                                                    |                                                                                                                                                                                                         |
| Item 5                                                                                                                                                                                                                                                                       | Did the selection criteria of the patients permit the study population to represent the full spectrum of those presenting with the symptom in the respective setting/ addressed in the review question? |
| Item 6                                                                                                                                                                                                                                                                       | Were the participating health care professionals/ institutions representative for the setting to be investigated in the review.                                                                         |
| <i>Judgement: Concern that the selection of patients and GPs introduced substantial variation or clinical heterogeneity: low, unclear, high</i>                                                                                                                              |                                                                                                                                                                                                         |
| <b>Domain B: Data collection and patient flow (refers to all studies regardless of the review question)</b>                                                                                                                                                                  |                                                                                                                                                                                                         |
| Item 7                                                                                                                                                                                                                                                                       | Were data about the symptom und the inclusion criteria collected directly from the patients (as opposed to a proxy like a register, routine documentation)                                              |
| Item 8                                                                                                                                                                                                                                                                       | Was the same mode of data collection used for all patients?                                                                                                                                             |
| Item 9                                                                                                                                                                                                                                                                       | Was the number of non-responders/ dropouts unlikely to affect the results?                                                                                                                              |
| <i>Judgement: Risk that the mode of data collection and/ or patient flow introduced bias: low, unclear, high</i>                                                                                                                                                             |                                                                                                                                                                                                         |
| <b>Domain C: Determination of the underlying aetiology/ diagnostic work-up (refers only to review question "What are the underlying conditions and their respective frequencies (differential diagnosis)?"). Had to be answered for each diagnostic category separately.</b> |                                                                                                                                                                                                         |
| Item 10                                                                                                                                                                                                                                                                      | Was the aetiologic category clearly defined?                                                                                                                                                            |
| Item 11                                                                                                                                                                                                                                                                      | Was the diagnostic work up likely to correctly classify the respective aetiology?                                                                                                                       |
| Item 12                                                                                                                                                                                                                                                                      | Did every patient receive the same diagnostic work up to detect the respective aetiology?                                                                                                               |
| <i>Judgement: Risk that the diagnostic work up introduced bias: low, unclear, high</i>                                                                                                                                                                                       |                                                                                                                                                                                                         |
| <b>Domain D: Determination of the prognosis/ prognostic work-up (refers only to review question "What is the prognosis of patients with the respective symptom presenting in the respective setting?") Had to be answered for each prognostic category separately.</b>       |                                                                                                                                                                                                         |
| Item 13                                                                                                                                                                                                                                                                      | Was the prognostic outcome clearly defined?                                                                                                                                                             |
| Item 14                                                                                                                                                                                                                                                                      | Did the study design include a comparison group without the symptom?                                                                                                                                    |
| Item 15                                                                                                                                                                                                                                                                      | Was the work up/ measurement likely to correctly classify the respective prognostic outcome?                                                                                                            |
| Item 16                                                                                                                                                                                                                                                                      | Did every patient receive the same work up/ mode of data collection to verify the respective prognostic outcome?                                                                                        |
| <i>Judgement: Risk that the prognostic work up introduced bias: low, unclear, high</i>                                                                                                                                                                                       |                                                                                                                                                                                                         |

## Detailed results:

### Domain A (Selection of patients and GPs) and domain B (Data collection and patient flow)

| Study                                                                                   | Domain A |        |        |        |                                               |        |        |                                                        | Domain B |        |        |                                                  |
|-----------------------------------------------------------------------------------------|----------|--------|--------|--------|-----------------------------------------------|--------|--------|--------------------------------------------------------|----------|--------|--------|--------------------------------------------------|
|                                                                                         | Item 1   | Item 2 | Item 3 | Item 4 | Risk of bias in selection of patients and GPs | Item 5 | Item 6 | Substantial variation in selection of patients and GPs | Item 7   | Item 8 | Item 9 | Risk of bias in data collection and patient flow |
| Ajmi 2011                                                                               | -        | -      | ?      | +      | ?                                             | +      | +      | low                                                    | ?        | +      | +      | low                                              |
| Albert 2011                                                                             | -        | -      | +      | -      | high                                          | -      | -      | high                                                   | +        | +      | -      | ?                                                |
| BEACH                                                                                   | -        | ?      | +      | +      | low                                           | +      | +      | low                                                    | +        | +      | +      | low                                              |
| Ben Abdelaziz 2004                                                                      | -        | +      | +      | -      | ?                                             | +      | +      | low                                                    | +        | +      | +      | low                                              |
| Coenen 2004                                                                             | +        | +      | +      | +      | low                                           | -      | +      | ?                                                      | +        | +      | -      | ?                                                |
| CONTENT Laux 2007                                                                       | -        | -      | ?      | +      | ?                                             | +      | +      | low                                                    | -        | +      | +      | ?                                                |
| CONTENT Leutgeb 2014                                                                    | -        | ?      | ?      | -      | ?                                             | +      | -      | ?                                                      | -        | +      | +      | ?                                                |
| French 2005                                                                             | +        | +      | +      | -      | high                                          | +      | +      | low                                                    | +        | +      | +      | low                                              |
| GRACE<br>Butler 2009;<br>Godycki-Cwirko 2011;<br>Stanton 2010;<br>Van Vugt, Butler 2012 | +        | +      | +      | +      | low                                           | ?      | +      | ?                                                      | +        | +      | -      | ?                                                |
| GRACE<br>Francis 2012;<br>Hordijk 2014;<br>Van Vugt 2015;<br>Wood 2011                  | +        | +      | +      | +      | low                                           | ?      | +      | ?                                                      | +        | +      | +      | low                                              |
| GRACE Teepe 2015                                                                        | +        | +      | +      | +      | low                                           | ?      | +      | ?                                                      | +        | +      | ?      | low                                              |
| GRACE<br>Van Vugt, Broekhuizen 2012;<br>Van Vugt, Broekhuizen 2013                      | +        | +      | +      | +      | low                                           | -      | +      | high                                                   | +        | +      | +      | low                                              |
| Hamre 2005                                                                              | +        | +      | +      | +      | low                                           | ?      | ?      | ?                                                      | +        | +      | +      | low                                              |
| Harding 1980                                                                            | -        | +      | +      | +      | low                                           | +      | ?      | ?                                                      | +        | +      | +      | low                                              |
| Hofmans-Okkes 1993<br>International Study                                               | -        | -      | +      | +      | low                                           | ?      | ?      | ?                                                      | +        | +      | +      | low                                              |
| Hofmans-Okkes 1993<br>Dutch Study                                                       | -        | -      | ?      | ?      | ?                                             | ?      | ?      | ?                                                      | +        | +      | +      | low                                              |
| Hull 1969                                                                               | +        | +      | +      | -      | high                                          | ?      | +      | ?                                                      | +        | +      | +      | low                                              |
| Liu 2017                                                                                | -        | ?      | +      | -      | high                                          | +      | +      | low                                                    | +        | +      | +      | low                                              |
| Martin 1984                                                                             | -        | +      | ?      | -      | high                                          | ?      | -      | high                                                   | +        | +      | +      | low                                              |
| Mash 2012                                                                               | -        | ?      | +      | +      | low                                           | +      | -      | high                                                   | +        | +      | +      | low                                              |
| Molony 2016                                                                             | -        | +      | +      | -      | high                                          | +      | +      | low                                                    | -        | +      | +      | ?                                                |
| Morrell 1971/1972                                                                       | -        | +      | ?      | -      | high                                          | -      | ?      | high                                                   | +        | +      | ?      | low                                              |
| Munyati 2005                                                                            | +        | +      | +      | -      | high                                          | -      | +      | high                                                   | +        | +      | +      | low                                              |
| NAMCS Metlay 1998                                                                       | -        | -      | ?      | +      | ?                                             | +      | +      | low                                                    | +        | +      | ?      | ?                                                |
| NAMCS Schappert 1999                                                                    | -        | ?      | +      | +      | low                                           | +      | +      | low                                                    | +        | +      | +      | low                                              |
| Nantha 2014                                                                             | +        | -      | ?      | -      | high                                          | +      | +      | low                                                    | +        | +      | -      | ?                                                |
| Njalsson 1992                                                                           | -        | -      | ?      | +      | low                                           | +      | +      | low                                                    | -        | +      | +      | ?                                                |
| Robertson 1981                                                                          | -        | -      | +      | -      | high                                          | +      | +      | low                                                    | +        | +      | +      | low                                              |
| SESAM 2 Frese 2008                                                                      | -        | +      | +      | +      | low                                           | +      | +      | low                                                    | +        | +      | +      | low                                              |
| SESAM 2 Frese 2016                                                                      | -        | +      | +      | +      | low                                           | -      | +      | high                                                   | +        | +      | +      | low                                              |
| Silva 1998                                                                              | -        | +      | +      | +      | low                                           | +      | +      | low                                                    | +        | +      | +      | low                                              |
| Stefanoff 2014                                                                          | +        | ?      | ?      | +      | ?                                             | ?      | ?      | ?                                                      | +        | +      | -      | ?                                                |
| TRANSITION<br>Hofmans-Okkes 1993                                                        | -        | -      | +      | +      | low                                           | +      | +      | low                                                    | +        | +      | +      | low                                              |
| TRANSITION Okkes 2002                                                                   | -        | ?      | +      | +      | low                                           | +      | +      | low                                                    | +        | +      | ?      | low                                              |
| Verzantvoort 2018                                                                       | -        | ?      | +      | +      | low                                           | ?      | -      | high                                                   | +        | +      | +      | low                                              |
| Wong 2016                                                                               | +        | +      | +      | +      | low                                           | ?      | +      | ?                                                      | +        | +      | -      | ?                                                |
| Woolnough 1985                                                                          | -        | -      | +      | -      | high                                          | ?      | +      | ?                                                      | +        | +      | ?      | ?                                                |
| Worrall 2008                                                                            | +        | -      | +      | -      | high                                          | +      | +      | low                                                    | +        | +      | +      | low                                              |

Legend: + Yes, - No, ? Unclear

**Domain C (Determination of the underlying aetiology of cough / diagnostic work-up)**

|                                                                                                                                                                                                                                                                                                                                                                                                                                          |                                                                                                                                                                                                                                                                                                                                                         | Domain C |         |         |                                    |
|------------------------------------------------------------------------------------------------------------------------------------------------------------------------------------------------------------------------------------------------------------------------------------------------------------------------------------------------------------------------------------------------------------------------------------------|---------------------------------------------------------------------------------------------------------------------------------------------------------------------------------------------------------------------------------------------------------------------------------------------------------------------------------------------------------|----------|---------|---------|------------------------------------|
| Study                                                                                                                                                                                                                                                                                                                                                                                                                                    | Aetiologic category                                                                                                                                                                                                                                                                                                                                     | Item 10  | Item 11 | Item 12 | Risk of bias in diagnostic work-up |
| CONTENT Laux 2007                                                                                                                                                                                                                                                                                                                                                                                                                        | R78 acute bronchitis / bronchiolitis, R96 asthma, R79 chronic bronchitis, R95 COPD, R80 influenza, R77 laryngitis / tracheitis acute, R71 pertussis, R81 pneumonia, R75 sinusitis acute / chronic, R84 malignant neoplasm bronchus/lung, R76 tonsillitis acute, R74 Upper respiratory infection acute (ICPC process codes)                              | -        | ?       | -       | high                               |
| French 2005                                                                                                                                                                                                                                                                                                                                                                                                                              | asthma, GERD, URTI                                                                                                                                                                                                                                                                                                                                      | -        | ?       | ?       | ?                                  |
| GRACE Francis 2012                                                                                                                                                                                                                                                                                                                                                                                                                       | LRTI, URTI, viral / other RTI, pneumonia                                                                                                                                                                                                                                                                                                                | -        | ?       | -       | high                               |
| GRACE Stanton 2010                                                                                                                                                                                                                                                                                                                                                                                                                       | chronic bronchitis / bronchiectasis                                                                                                                                                                                                                                                                                                                     | -        | ?       | -       | high                               |
| GRACE Teepe 2015                                                                                                                                                                                                                                                                                                                                                                                                                         | pertussis                                                                                                                                                                                                                                                                                                                                               | -        | +       | +       | low                                |
| GRACE Van Vugt, Broekhuizen 2012                                                                                                                                                                                                                                                                                                                                                                                                         | acute bronchitis / bronchiolitis                                                                                                                                                                                                                                                                                                                        | -        | -       | +       | high                               |
|                                                                                                                                                                                                                                                                                                                                                                                                                                          | suspected malignancy                                                                                                                                                                                                                                                                                                                                    | +        | ?       | +       | ?                                  |
| GRACE Van Vugt 2015                                                                                                                                                                                                                                                                                                                                                                                                                      | influenza                                                                                                                                                                                                                                                                                                                                               | -        | +       | +       | low                                |
| GRACE Wood 2011                                                                                                                                                                                                                                                                                                                                                                                                                          | asthma, COPD                                                                                                                                                                                                                                                                                                                                            | -        | ?       | -       | high                               |
| Morrell 1972                                                                                                                                                                                                                                                                                                                                                                                                                             | acute bronchitis, chronic bronchitis, common cold, influenza, laryngitis / tracheitis, pertussis, pneumonia                                                                                                                                                                                                                                             | -        | ?       | -       | high                               |
| Munyati 2005                                                                                                                                                                                                                                                                                                                                                                                                                             | asthma, cryptococcosis, fibrotic lung disease (post-tuberculous disease, idiopathic diffuse fibrosis), heart failure, HIV-associated, LRTI, pneumocystis pneumonia, bacterial pneumonia, tuberculosis, cancer (pulmonary / cutaneous Kaposi sarcoma)                                                                                                    | +        | +       | +       | low                                |
| NAMCS Metlay 1998                                                                                                                                                                                                                                                                                                                                                                                                                        | acute bronchitis / bronchitis not specified as acute or chronic 466/490, URTI 465, asthma 493, acute / chronic rhinosinusitis 461/473, pneumonia 481-483/485-486, influenza 487, pharyngitis 462, nasopharyngitis / common cold 460 (ICD-9-CM process codes)                                                                                            | -        | ?       | -       | high                               |
| Nantha 2014                                                                                                                                                                                                                                                                                                                                                                                                                              | ACE-inhibitor induced, bronchial asthma, acute bronchitis, COPD, GERD, heart failure, pneumonia, post infectious cough, lung cancer, pulmonary tuberculosis, upper airway cough syndrome                                                                                                                                                                | +        | +       | ?       | ?                                  |
| SESAM 2 Frese 2008                                                                                                                                                                                                                                                                                                                                                                                                                       | acute laryngitis / tracheitis, exacerbation chronic bronchitis / COPD, influenza, pneumonia, asthma                                                                                                                                                                                                                                                     | -        | ?       | -       | high                               |
| Stefanoff 2014                                                                                                                                                                                                                                                                                                                                                                                                                           | pertussis                                                                                                                                                                                                                                                                                                                                               | +        | +       | -       | high                               |
| TRANSITION Okkes 2002                                                                                                                                                                                                                                                                                                                                                                                                                    | R74 upper respiratory infection (head cold), R78 acute bronchitis / bronchiolitis, R77 acute laryngitis / tracheitis, R75 sinusitis acute / chronic, R80 influenza (proven), R96 asthma, R81 pneumonia, R76 tonsillitis acute, R91 chronic bronchitis / bronchiectasis, R95 emphysema /COPD, R71 whooping cough, K77 heart failure (ICPC process codes) | -        | ?       | -       | high                               |
| Woolnough 1985                                                                                                                                                                                                                                                                                                                                                                                                                           | bronchospasm                                                                                                                                                                                                                                                                                                                                            | +        | +       | +       | low                                |
| Worrall 2008                                                                                                                                                                                                                                                                                                                                                                                                                             | asthma, croup, influenza, pneumonia, viral RTI                                                                                                                                                                                                                                                                                                          | -        | ?       | -       | high                               |
| <i>Legend: + Yes, - No, ? Unclear, ACE = Angiotensin-converting-enzyme, COPD = chronic obstructive pulmonary disease, GERD = gastroesophageal reflux disease, ICD-9-CM = The International Classification of Diseases 9th revision Clinical Modification, ICPC = International Classification of Primary Care, LRTI = lower respiratory tract infection, RTI = respiratory tract infection, URTI = upper respiratory tract infection</i> |                                                                                                                                                                                                                                                                                                                                                         |          |         |         |                                    |

**Domain D (Determination of the prognosis / prognostic work-up)**

|                                       |                                                                                                                                                                                                                        | Domaine D |         |         |         |                                    |
|---------------------------------------|------------------------------------------------------------------------------------------------------------------------------------------------------------------------------------------------------------------------|-----------|---------|---------|---------|------------------------------------|
| Study                                 | Prognostic category                                                                                                                                                                                                    | Item 13   | Item 14 | Item 15 | Item 16 | Risk of bias in prognostic work-up |
| Coenen 2004                           | reconsultation, hospitalization                                                                                                                                                                                        | +         | -       | ?       | ?       | ?                                  |
| GRACE Butler 2009                     | median time to patients reporting feeling recovered, median time for patients' symptom severity scores to drop to 0                                                                                                    | +         | -       | +       | +       | low                                |
|                                       | admitted to hospital                                                                                                                                                                                                   | +         | -       | ?       | +       | ?                                  |
| GRACE Coenen 2013                     | median time for patients' symptom severity scores to drop to 0                                                                                                                                                         | +         | -       | +       | +       | low                                |
| GRACE Godycki-Cwirko 2011             | reported recovery, median duration of cough after presentation                                                                                                                                                         | +         | -       | +       | +       | low                                |
|                                       | admitted to hospital, reconsultation                                                                                                                                                                                   | +         | -       | ?       | ?       | ?                                  |
| GRACE Hordijk 2014                    | hospitalized for this illness episode during the 28 day follow up period, reconsulted their GP for this LRTI episode, absent of work/school for a mean of                                                              | +         | -       | ?       | ?       | ?                                  |
|                                       | mean symptom severity score at day 1, mean symptom severity score at day 28, steepest decline in symptom scores, felt recovered after 4 weeks, not feeling recovered at 28 days, total illness duration, mean          | +         | -       | +       | +       | low                                |
| GRACE Van Vugt, Butler 2012           | hospitalized, died, re-consultation rate                                                                                                                                                                               | +         | -       | ?       | ?       | ?                                  |
|                                       | stated they felt recovered at 14 days, prolonged illness (>3 weeks)                                                                                                                                                    | +         | -       | +       | +       | low                                |
| GRACE Van Vugt, Broekhuizen 2013      | mortality, admitted to hospital                                                                                                                                                                                        | +         | -       | ?       | ?       | ?                                  |
| Hamre 2005                            | at day 1: first improvement, at day 3: first improvement, at day 7: major improvement + complete recovery, at day 7: complete recovery, at day 14: major improvement + complete recovery, at day 14: complete recovery | +         | -       | +       | +       | low                                |
| Harnden 2006                          | total duration of cough, 2 months after the start of their symptoms still coughing                                                                                                                                     | +         | -       | +       | +       | low                                |
| Wong 2016                             | mean time for cough recovery                                                                                                                                                                                           | +         | -       | +       | +       | low                                |
|                                       | hospitalisation since first consult, average days of hospitalisation, re-consultation to health professional                                                                                                           | +         | -       | ?       | ?       | ?                                  |
| <i>Legend: + Yes, - No, ? Unclear</i> |                                                                                                                                                                                                                        |           |         |         |         |                                    |
