# Supplementary material for: Prevalence, aetiologies and prognosis of the symptom cough in primary care: a systematic review and meta-analysis
Source: Springer Nature journal article supplement (doi:10.1186/s12875-021-01501-0), 2021-07-12
Supplement: MOESM3 [file 19353898]

## Additional file 3: Meta-analysis: Prevalence/incidence of cough in African, Asian and South American countries

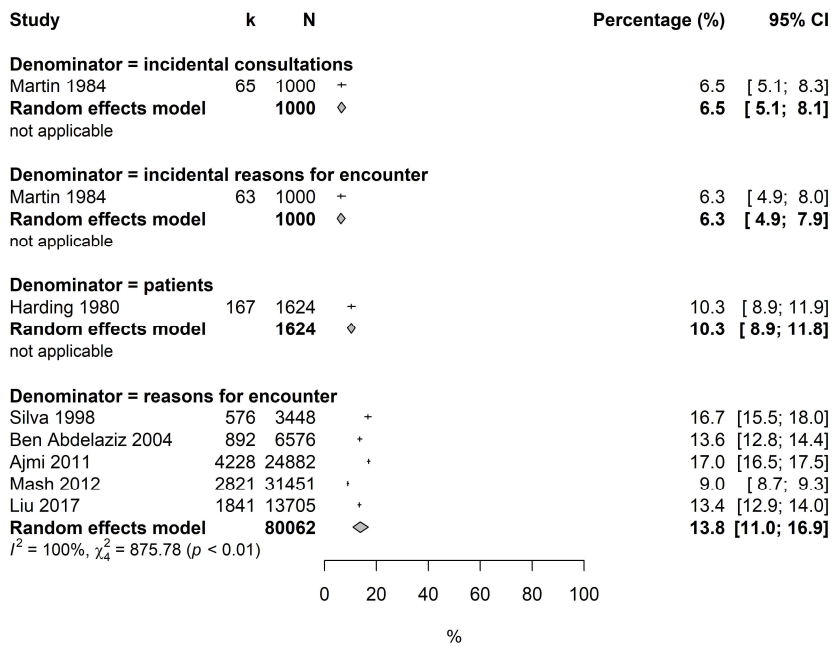

Figure 1: Meta-analysis: Prevalence/incidence of cough of all durations seen in primary care patients of all age groups in Asian, African and South American countries sorted by denominators. CI = confidence interval, k = number of (incidental) consultations because of a cough / patients in consultation for a cough / reason for encounter = cough, N = total number of (incidental) consultations / patients in consultation / reasons for encounter
