# Supplementary material for: Prevalence, aetiologies and prognosis of the symptom cough in primary care: a systematic review and meta-analysis
Source: Springer Nature journal article supplement (doi:10.1186/s12875-021-01501-0), 2021-07-12
Supplement: MOESM4 [file 19353898]

## Additional file 4: Aetiologies of subacute and chronic cough

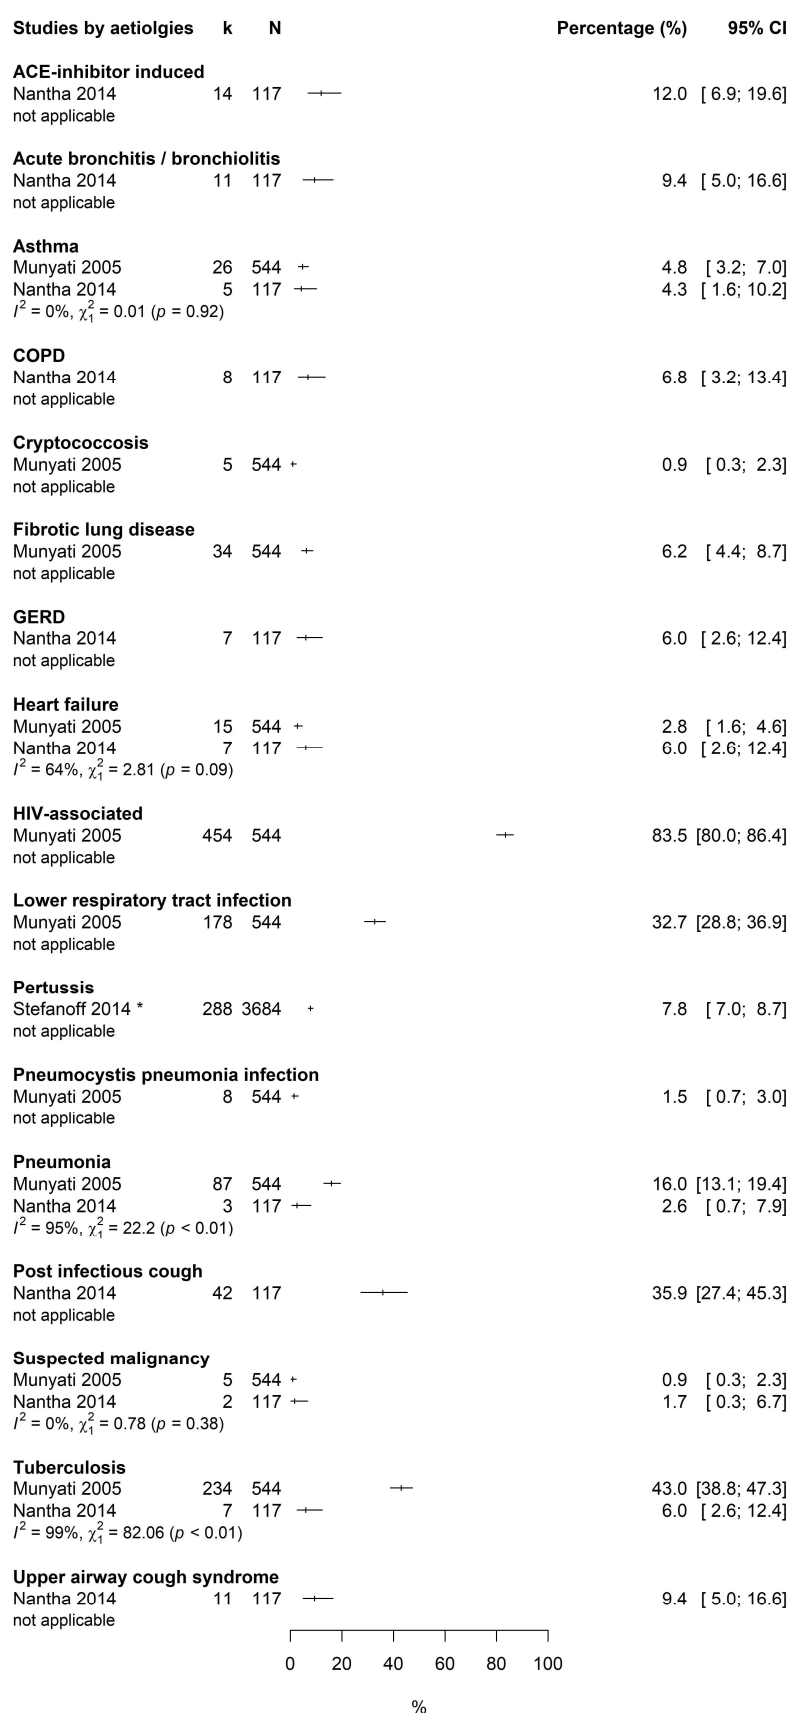

Figure 1: Forest plot: prevalences of selected aetiologies, referring to adult primary care patients in consultation for a subacute or chronic cough, using the denominator patients. \* = Stefanoff 2014 included patients of all age groups, ACE = Angiotensin-converting-enzyme, CI = confidence interval, COPD = Chronic obstructive pulmonary disease, GERD = Gastroesophageal reflux disease, k = number of patients with the respective aetiology, N = total number of patients in consultation for a cough.
